# Supplementary material for: A Newly Established Murine Cell Line as a Model for Hepatocellular Cancer in Non-Alcoholic Steatohepatitis
Source: MDPI journal article supplement (doi:10.3390/ijms20225658), 2019-11-12
Supplement: s1 [file s1]

**a**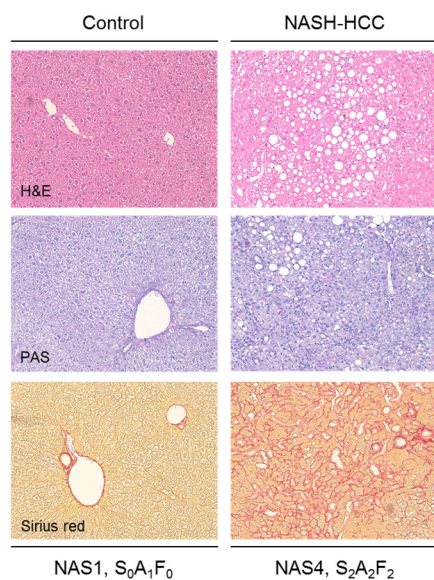**b**

| Characteristics       | Human | N-HCC25<br>animal model |
|-----------------------|-------|-------------------------|
| Weight gain           | +     | +                       |
| Glucose intolerance   | +     | +                       |
| Steatosis             | +     | +                       |
| Lobular Inflammation  | +     | +                       |
| Hepatocyte ballooning | +     | +                       |
| Fibrosis              | +     | +                       |
| Cirrhosis             | +     | -                       |
| HCC                   | +     | +                       |

**Figure S1.** (a) Representative histological pictures of livers: Comparison of NASH-HCC mice (treatment with DMBA and western diet) to controls (treatment with DMBA and regular diet). (b) Metabolic and histopathological characteristics of human and murine NASH-derived HCC.

**a**

primary hepatocytes - 40,XY

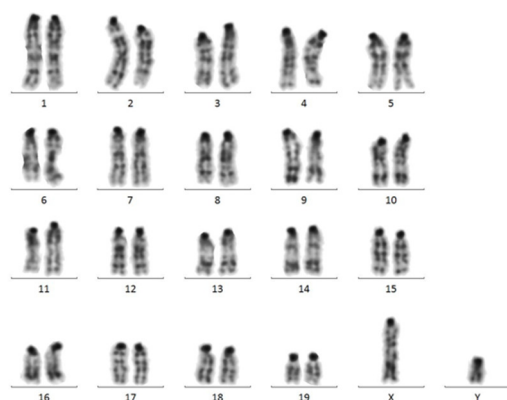**b**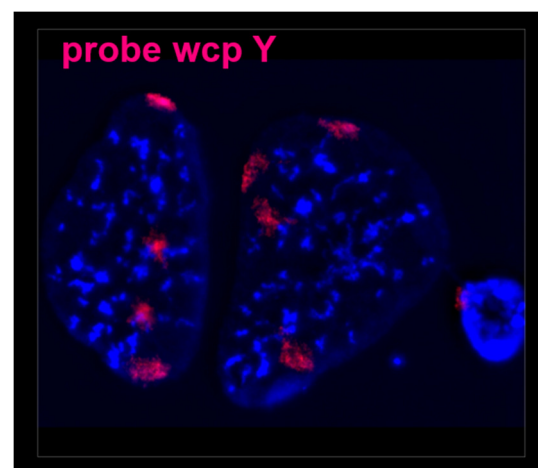

**Figure S2:** (a) Karyogram of wild type primary hepatocytes. (b). Representative picture N-HCC25 interphase nuclei with marked amplification of the Y chromosome

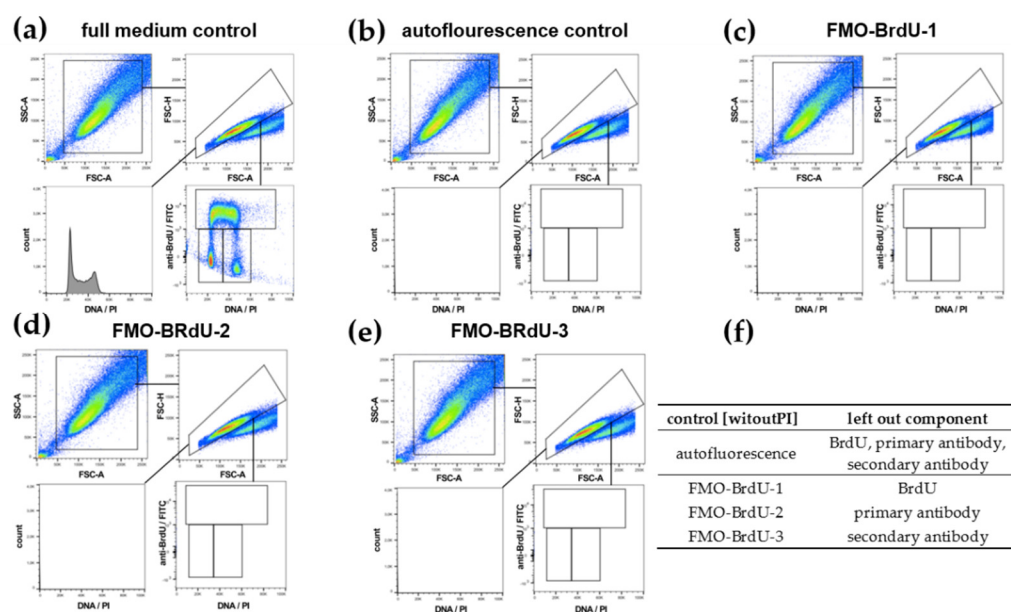

**Figure S3.** Gating strategy and technical controls of flow cytometry with BrdU and PI. The applied gating strategy in flow cytometry experiments is demonstrated in **a** (full medium control with all components). Results of technical controls are shown in **b–e** while the left out components are listed in **f** (FMO = fluorescence minus one).
